# Supplementary material for: An efficient and sensitive chemosensor based on salicylhydrazide for naked-eye and fluorescent detection of Zn2+
Source: Royal Society of Chemistry journal article supplement (doi:10.1039/c7ra13592k), 2018-01-01
Supplement: c7ra13592k1.pdf [file c7ra13592k1.pdf]

## *Supporting Information*

### **An efficient and sensitive chemosensor based on salicylhydrazide for naked-eye and fluorescent detection of Zn<sup>2+</sup>**

Zhanglin Shi<sup>#</sup>, Yayi Tu<sup>#</sup>, Shouzhi Pu<sup>\*</sup>

*Jiangxi Key Laboratory of Organic Chemistry, Jiangxi Science and Technology Normal  
University, Nanchang 330013, China*

<sup>#</sup>These authors contributed equally to this work.

<sup>\*</sup>Corresponding author: pushouzhi@tsinghua.org.cn (S. Pu), Tel. & Fax: +86-791-83831996.

#### **Contents**

**Fig. S1.** <sup>1</sup>H NMR spectra of **10** in DMSO-*d*<sub>6</sub>.

**Fig. S2.** <sup>13</sup>C NMR spectra of **10** in DMSO-*d*<sub>6</sub>.

**Fig. S3.** IR spectra of **10**.

**Fig. S4.** Mass spectrum of **10**.

**Fig. S5.** Changes in fluorescence intensity of **10** upon irradiation with UV/Vis light.

**Fig. S6.** The emission intensity curve at 510 nm with the addition of different equiv. Zn<sup>2+</sup>.

**Fig. S7.** Mass spectrum of **10'**.

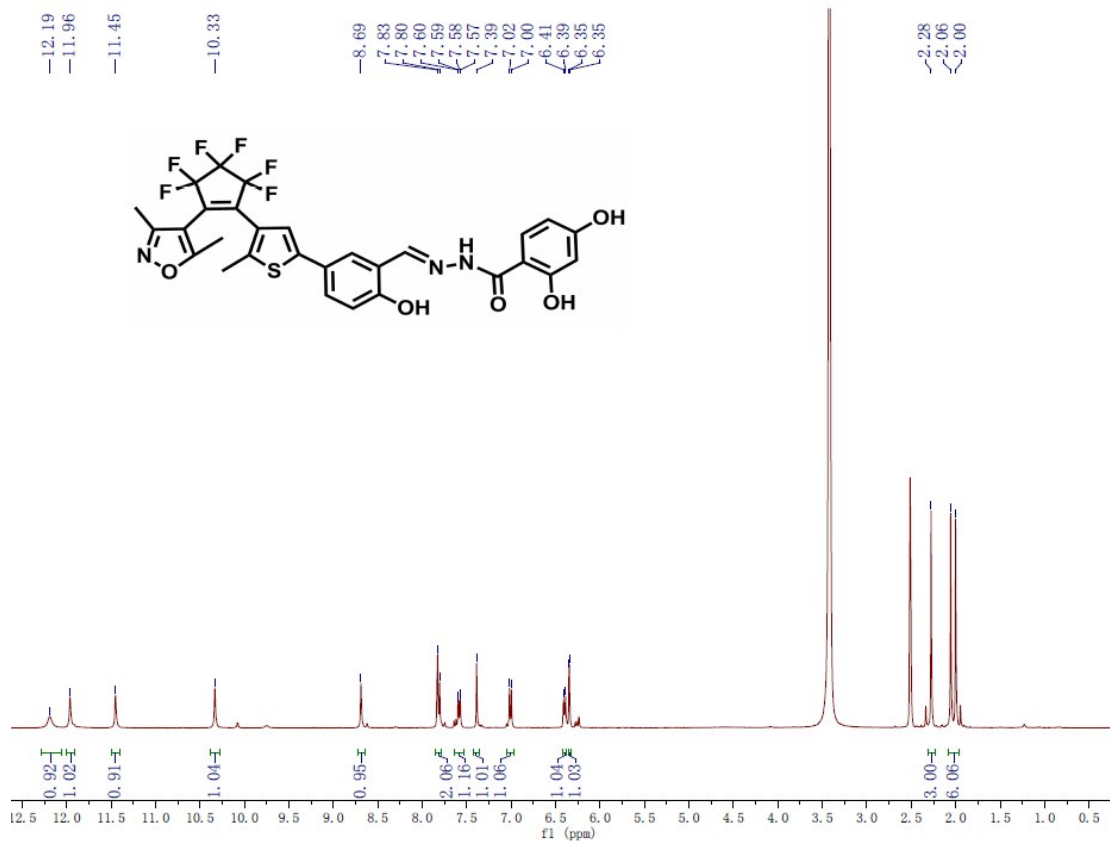

**Fig. S1.**  $^1\text{H}$  NMR spectra of **10** in  $\text{DMSO-}d_6$ .

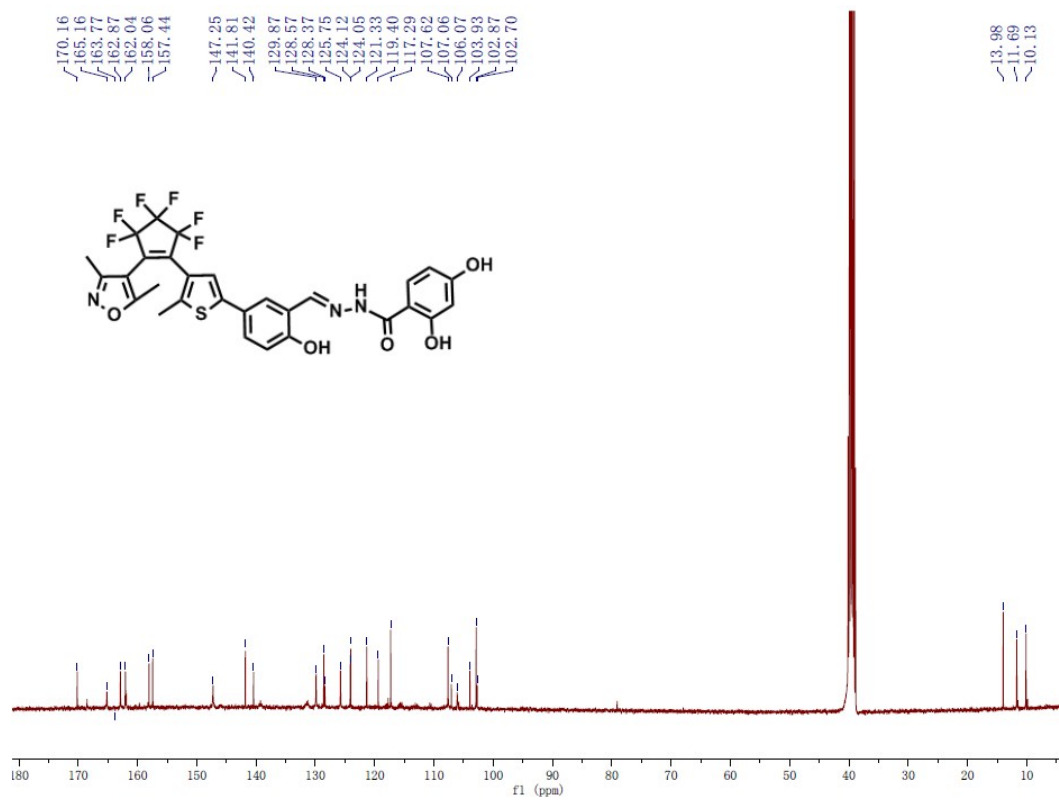

**Fig. S2.**  $^{13}\text{C}$  NMR spectra of **10** in  $\text{DMSO-}d_6$ .

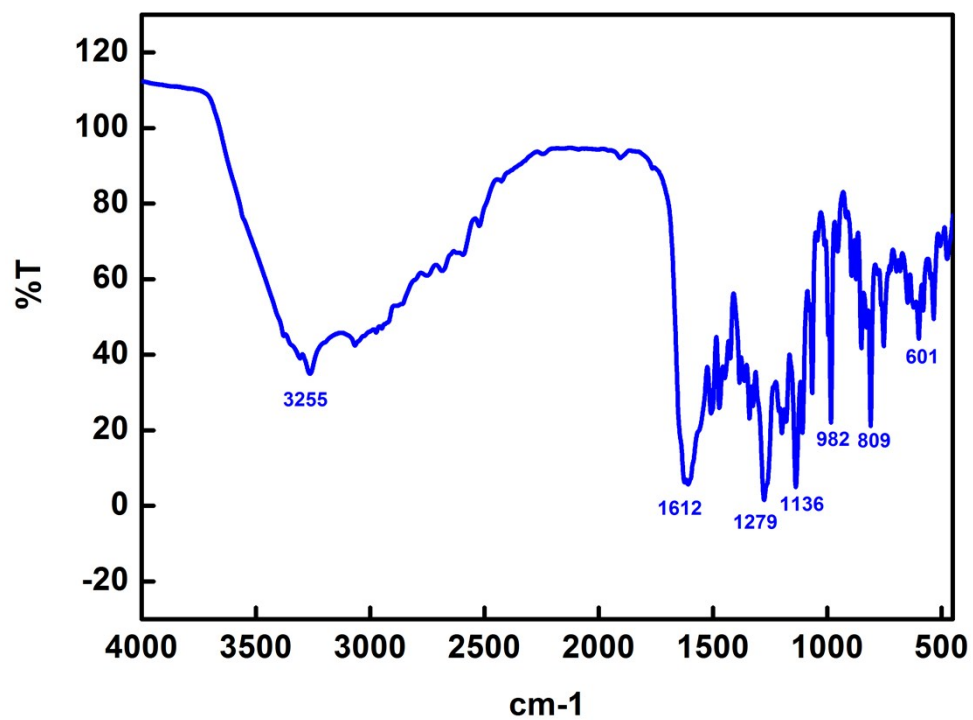

Fig. S3. IR spectra of 10.

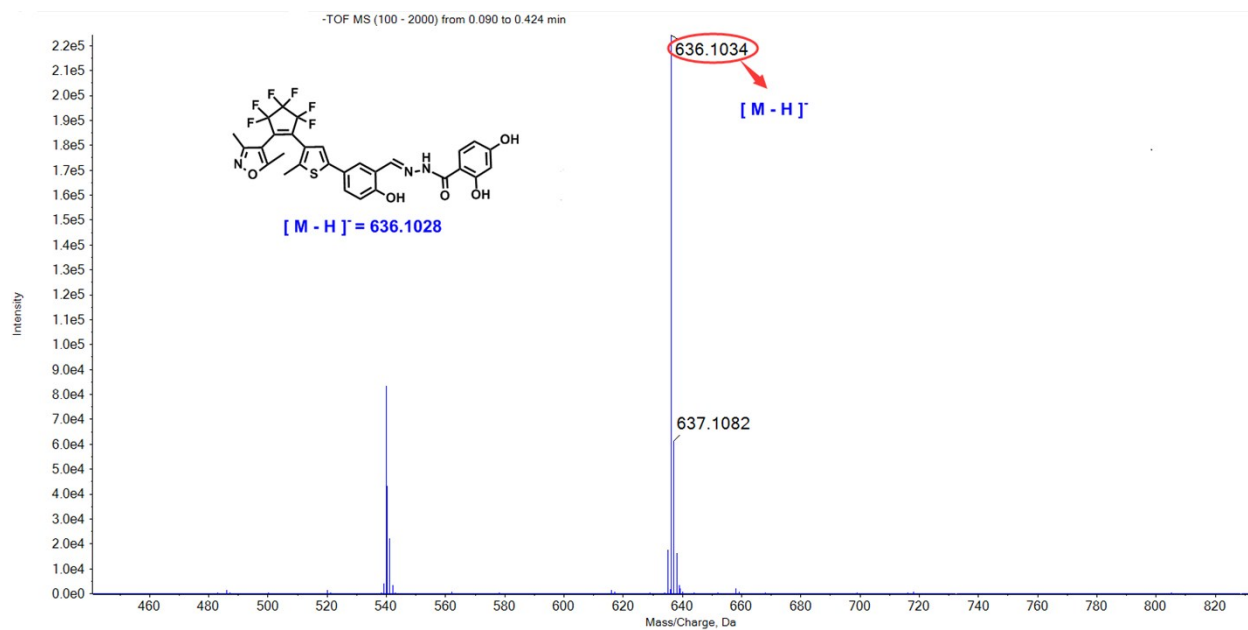

Fig. S4. Mass spectrum of **10**.

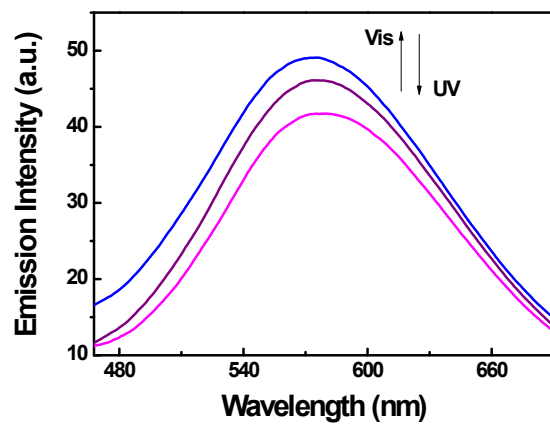

**Fig. S5.** Changes in fluorescence intensity of **10** upon irradiation with UV/Vis light.

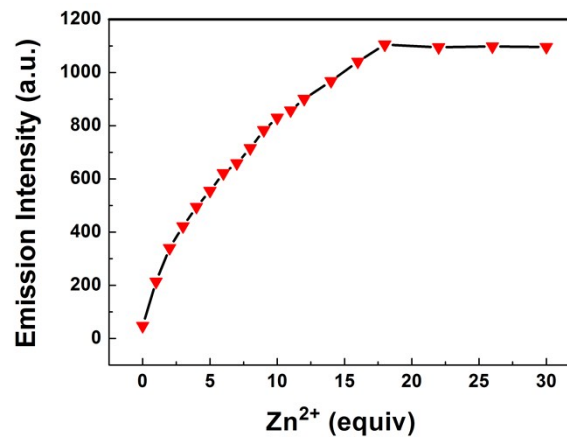

**Fig. S6.** The emission intensity curve at 510 nm with the addition of different equiv. Zn<sup>2+</sup>.

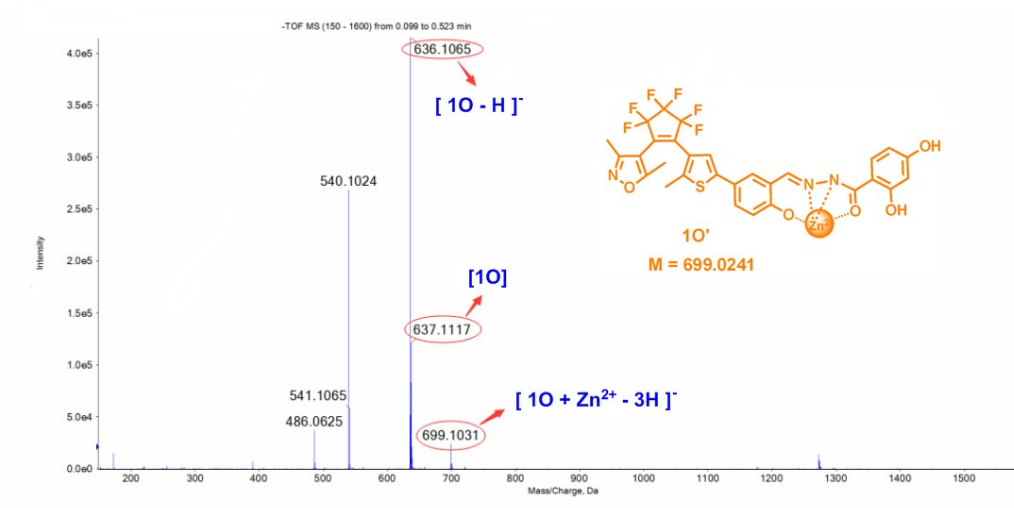

Fig. S7. Mass spectrum of **10'**.
